# Supplementary material
Source: PubMed Central journal article supplement (PMC10317567)
Supplement: 10-1055-s-0042-1750178-s220273.pdf [file 10-1055-s-0042-1750178-s220273.pdf]

**Supplemental Table S1** Associations between sinus involvement and other factors

|                                     | No sinus involvement |      | Sinus involvement |      | p-Value |
|-------------------------------------|----------------------|------|-------------------|------|---------|
|                                     | n                    | %    | n                 | %    |         |
| Skull base involvement (n = 257)    | 27                   | 18.1 | 37                | 34.3 | 0.004   |
| Intracranial involvement (n = 263)  | 6                    | 3.9  | 9                 | 8.3  | 0.177   |
| Positive surgical margins (n = 244) | 25                   | 21.9 | 49                | 37.7 | 0.008   |
| Bony invasion (n = 150)             | 17                   | 20.2 | 33                | 50.0 | < 0.001 |
| Lymphovascular invasion (n = 108)   | 5                    | 7.1  | 3                 | 7.9  | 1.000   |
| Cartilage invasion (n = 141)        | 3                    | 3.8  | 16                | 25.8 | < 0.001 |
| Perineural invasion (n = 114)       | 5                    | 6.8  | 7                 | 17.1 | 0.114   |
| Angioinvasion (n = 107)             | 5                    | 7.0  | 3                 | 8.3  | 1.000   |
| Dural invasion (n = 227)            | 2                    | 1.8  | 5                 | 4.3  | 0.446   |
| Brain invasion (n = 174)            | 1                    | 0.9  | 2                 | 2.9  | 0.561   |
| Orbital invasion (n = 208)          | 4                    | 4.3  | 29                | 25.4 | < 0.001 |
